# Supplementary material
Source: Research Square preprint supplement (doi:10.21203/rs.3.rs-10347261/v1)
Supplement: Supplementary file 1 [file 8f37abc1f7f6fe230c4a2511.xlsx]

## Sheet: Supplementary Table S1
Cytokine	N_pairs	Pearson_r	Spearman_rho	Mean_diff_kitB_minus_kitA	MAE	Comparability	Included in panel (Yes/No)
Eotaxin	37	0.865915	0.829115	-72.8478	87.6332	Good	Yes
IL-15	37	-	-	-	-	Insufficient data	No
Basic FGF	37	0.552307	0.573507	1.47459	23.7595	Good	Yes
IL-1 beta	37	0.489442	0.502168	2.18243	2.38838	Good	Yes
IL-1ra	37	0.686979	0.66136	227.858	256.5	Good	No
IL-2Ralpha	37	0.730999	0.543806	34.7227	92.0465	Good	Yes
IL-4	37	0.707135	0.709372	0.578378	0.807568	Good	Yes
IL-6	37	0.947233	0.717089	6.04189	8.85162	Good	Yes
IL-7	37	0.354813	0.560107	11.9181	15.8857	Good	Yes
IL-8	37	0.752911	0.608401	1.71973	2.30351	Good	Yes
IP-10	37	0.770472	0.672874	-376.747	413.666	Good	No
MCP-1	37	0.80142	0.741185	29.9727	30.1008	Good	Yes
MIP-1alpha	37	0.619201	0.569205	0.295405	0.668919	Good	Yes
PDGF-BB	37	0.612801	0.636434	-340.446	532.918	Good	No
G-CSF	37	0.445394	0.346811	-87.0546	87.0546	Poor	No
IFN-gamma	37	0.310809	0.251207	-9.98554	9.98554	Poor	No
IL-2	37	-0.0865337	-0.0295377	-2.33027	5.1773	Poor	No
IL-5	37	0.289908	0.242628	-43.5007	43.798	Poor	No
IL-9	37	0.365646	0.450374	38.1886	226.729	Poor	No
IL-10	37	0.795392	0.381399	0.699459	5.71351	Poor	No
IL-12 (p70)	37	0.0615215	0.173832	-2.55743	3.88797	Poor	No
IL-13	37	0.593582	0.485051	2.14608	2.15743	Poor	No
IL-17	37	0.400978	0.487378	31.5168	31.5168	Poor	No
MIP-1beta	37	0.0372304	0.14925	3.9727	84.9268	Poor	No
RANTES	37	0.398475	0.412281	2875.62	3468.82	Poor	No
TNF-alpha	37	0.176969	0.36396	-38.2751	57.4795	Poor	No
VEGF	37	0.105662	0.145545	-44.8691	58.7785	Poor	No
Supplementary Table S1. Inter-kit comparison of cytokine measurements and selection of the panel

## Sheet: Supplementary Table S2
Cytokine	p_value	q_value	AUC	median_NR	median_R	log2FC_R_vs_NR	n_NR	n_R
MIP-1alpha	0.0259775	0.120849	0.677419	1.065	1.51	0.468448	62	17
Eotaxin	0.0277335	0.120849	0.675522	94.14	169.17	0.843492	62	17
IL-6	0.0475712	0.120849	0.65797	4.295	5.86	0.426081	62	17
IL-2Ralpha	0.0483397	0.120849	0.657495	69.86	115.13	0.707303	62	17
MCP-1	0.0879321	0.175864	0.636148	17.725	20.85	0.226023	62	17
IL-4	0.156727	0.236818	0.612903	1.58	1.96	0.262403	62	17
IL-1 beta	0.165772	0.236818	0.610531	4.29	5.01	0.211074	62	17
Basic FGF	0.225649	0.282062	0.596774	55.42	64.85	0.223619	62	17
IL-8	0.299029	0.304367	0.583017	3.605	4	0.126788	62	17
IL-7	0.304367	0.304367	0.582068	22.46	25.6	0.177317	62	17
Supplementary Table S2. Full univariate baseline analysis (T1). R, Relapse; NR, Non-Relapse

## Sheet: Supplementary Table S3
Cytokine	p_value	q_value	AUC	median_NR	median_R	log2FC_R_vs_NR	N_NR	N_R
IL-7	0.00043418	0.0043418	0.833807	19.81	38.92	0.893234	22	16
IL-2Ralpha	0.00325655	0.0143785	0.784091	25.78	46.275	0.761671	22	16
Basic FGF	0.00431355	0.0143785	0.774148	50.5	63.245	0.277465	22	16
IL-8	0.0199165	0.0325609	0.724432	6.78	9.395	0.386176	22	16
MIP-1alpha	0.0208368	0.0325609	0.723011	0.75	1.155	0.600197	22	16
IL-1 beta	0.0209671	0.0325609	0.721591	6.415	7.9	0.265651	22	16
IL-4	0.0227926	0.0325609	0.71875	1.7	2.53	0.544548	22	16
IL-6	0.0411856	0.051482	0.677557	0.125	1.205	2.75702	22	16
Eotaxin	0.824515	0.88244	0.522727	68	66.64	-0.0243816	22	16
MCP-1	0.88244	0.88244	0.515625	61.705	56.42	-0.116474	22	16
Supplementary Table S3. Full univariate on-treatment analysis at T2. R, Relapse; NR, Non-Relapse

## Sheet: Supplementary Table S4
Cytokine	p_value	q_value	AUC	median_NR	median_R	log2FC_R_vs_NR	N_NR	N_R
MIP-1alpha	0.0890743	0.488494	0.64787	0.96	1.145	0.233097	57	14
IL-2Ralpha	0.102431	0.488494	0.642231	31.53	42.71	0.415414	57	14
Eotaxin	0.238851	0.49402	0.602757	114.65	148.295	0.369415	57	14
IL-6	0.250179	0.49402	0.600251	3.24	3.52	0.107342	57	14
MCP-1	0.291392	0.49402	0.592105	25.29	32.105	0.335959	57	14
IL-1 beta	0.365481	0.49402	0.578947	4.29	4.415	0.0383514	57	14
Basic FGF	0.397549	0.49402	0.573935	57.36	51.495	-0.151976	57	14
IL-8	0.418017	0.49402	0.570802	5.7	6.28	0.125249	57	14
IL-7	0.717536	0.728301	0.531955	25.6	24.51	-0.0591151	57	14
IL-4	0.728301	0.728301	0.530702	1.55	1.465	-0.0746767	57	14
Supplementary Table S4. Full univariate on-treatment analysis at T3. R, Relapse; NR, Non-Relapse

## Sheet: Supplementary Table S5
Variable	N	Events	HR_perSD	HR_lo	HR_hi	p	C-index	p_PH
Δ_IL-6__T2-T1	38	16	0.60927	0.42374	0.876032	0.00748843	0.61242	0.666616
Δ_MIP-1alpha__T2-T1	38	16	0.721254	0.498609	1.04332	0.0827694	0.562099	0.276435
Δ_MCP-1__T2-T1	38	16	0.769666	0.457593	1.29457	0.323738	0.615632	0.338773
Δ_IL-7__T2-T1	38	16	1.24508	0.766901	2.02143	0.375314	0.557816	0.495269
Δ_IL-2Ralpha__T2-T1	38	16	0.840609	0.570215	1.23922	0.380586	0.475375	0.0762117
Δ_IL-4__T2-T1	38	16	1.15381	0.724001	1.83877	0.547376	0.523555	0.544273
Δ_Basic FGF__T2-T1	38	16	1.13369	0.7475	1.7194	0.554877	0.531049	0.330556
Δ_IL-1 beta__T2-T1	38	16	1.09596	0.701928	1.71117	0.686903	0.481799	0.657499
Δ_IL-8__T2-T1	38	16	1.05622	0.704797	1.58288	0.790996	0.594218	0.783266
Δ_Eotaxin__T2-T1	38	16	1.02347	0.663313	1.57919	0.916494	0.494647	0.939783
Δ_IL-6__T3-T1	71	14	0.675348	0.483099	0.944103	0.021648	0.659635	0.36291
Δ_Basic FGF__T3-T1	71	14	0.800817	0.522007	1.22854	0.309012	0.616876	0.898733
Δ_IL-8__T3-T1	71	14	1.22193	0.78882	1.89283	0.369397	0.562144	0.378694
Δ_IL-7__T3-T1	71	14	0.848434	0.557035	1.29227	0.4439	0.59236	0.68806
Δ_IL-1 beta __T3-T1	71	14	1.13576	0.741898	1.73871	0.557939	0.516534	0.93764
Δ_IL-4__T3-T1	71	14	0.85563	0.560724	1.30564	0.469614	0.571836	0.930406
Δ_Eotaxin__T3-T1	71	14	0.887268	0.576568	1.3654	0.586544	0.508552	0.716307
Δ_IL-2Ralpha__T3-T1	71	14	0.916661	0.629375	1.33508	0.650131	0.621437	0.889333
Δ_MCP-1__T3-T1	71	14	1.09656	0.720535	1.66882	0.667037	0.445838	0.315145
Δ_MIP-1alpha__T3-T1	71	14	1.08701	0.68835	1.71655	0.720424	0.437286	0.727858
Supplementary Table S5. Dynamic cytokine analyses: continuous Cox and cutpoint-based survival results

## Sheet: Supplementary Table S6
Variable	Cutoff	logrank_p	HR_high_vs_low	HR_lo	HR_hi	p_Cox_binary	n_low	n_high
Δ_IL-6__T2-T1	-9.5358	0.00642678	0.341568	0.137491	0.848556	0.0206861	11	27
Δ_MCP-1__T2-T1	4.8656	0.0140077	0.379627	0.154866	0.930586	0.0342411	16	22
Δ_IL-8__T2-T1	2.85	0.0328002	2.371	0.956228	5.879	0.0624121	20	18
Δ_IL-1 beta__T2-T1	0.8384	0.125153	0.491986	0.176956	1.36785	0.173969	25	13
Δ_MIP-1alpha__T2-T1	-0.646	0.135142	0.544788	0.219854	1.34996	0.189577	12	26
Δ_Basic FGF__T2-T1	-21.166	0.151133	2.11255	0.669215	6.66881	0.202255	10	28
Δ_IL-7__T2-T1	-17.2036	0.255918	1.72154	0.603229	4.91308	0.309976	11	27
Δ_Eotaxin__T2-T1	16.4488	0.288301	0.601367	0.210275	1.71986	0.342845	27	11
Δ_IL-2Ralpha__T2-T1	-180.557	0.315399	0.652848	0.256639	1.66074	0.370724	10	28
Δ_IL-4__T2-T1	-0.5466	0.443725	0.714911	0.271151	1.88492	0.497478	10	28
Δ_IL-6__T3-T1	-7.42	0.00939634	0.382126	0.149259	0.978299	0.0448875	15	56
Δ_MCP-1__T3-T1	-2.576	0.0116236	0.373175	0.137601	1.01206	0.0528167	12	59
Δ_Basic FGF__T3-T1	4.22	0.0251634	0.423531	0.165637	1.08296	0.0728806	42	29
Δ_IL-7__T3-T1	-6.604	0.0292334	0.454569	0.186	1.11093	0.0837677	19	52
Δ_IL-2Ralpha__T3-T1	-200.042	0.0330522	0.427559	0.158819	1.15104	0.0926518	12	59
Δ_IL-8__T3-T1	3.988	0.0869225	2.09082	0.72382	6.03954	0.172955	61	10
Δ_IL-4__T3-T1	-0.118	0.118861	0.570336	0.237603	1.36902	0.208786	37	34
Δ_MIP-1alpha__T3-T1	-0.15	0.177893	0.620863	0.262795	1.46681	0.277204	35	36
Δ_Eotaxin__T3-T1	26.554	0.248517	0.613195	0.219608	1.71218	0.350557	51	20
Δ_IL-1 beta__T3-T1	-2.518	0.425545	1.56233	0.406869	5.9992	0.515712	10	61
Supplementary Table S6. Cutpoint-based progression-free survival analysis of longitudinal cytokine dynamics from baseline to on-treatment timepoints.

## Sheet: Supplementary Table S7
Variable	VarType	N	Events	HR	HR_lo	HR_hi	p	q_BH	C-index	p_PH	Prevalence_1
Histological subtype_Nodular sclerosis	binary(1 vs 0)	73	16	5.75507	0.759998	43.5801	0.0902129	0.324766	0.605058	0.125648	0.739726
iPET/CT response_CMR	binary(1 vs 0)	77	15	0.381139	0.130134	1.11628	0.0785217	0.324766	0.599707	0.0108869	0.805195
iPET/CT response_PMR	binary(1 vs 0)	77	15	2.62372	0.895832	7.68436	0.0785217	0.324766	0.599707	0.0108869	0.194805
Extranodal involvement_No	binary(1 vs 0)	80	17	0.421701	0.160448	1.10835	0.0798917	0.324766	0.608787	0.77024	0.6
Extranodal involvement_Yes	binary(1 vs 0)	80	17	2.37135	0.902243	6.23256	0.0798917	0.324766	0.608787	0.77024	0.4
Early-stage risk	binary(1 vs 0)	80	17	0.288696	0.0382782	2.17735	0.22814	0.676594	0.561925	0.315253	0.1625
Bulky disease by Ann Arbor/Cotswolds_No	binary(1 vs 0)	80	17	0.576181	0.202813	1.6369	0.300708	0.676594	0.553138	0.460037	0.7875
Bulky disease by Ann Arbor/Cotswolds_Yes	binary(1 vs 0)	80	17	1.73556	0.610911	4.93064	0.300708	0.676594	0.553138	0.460037	0.2125
Radiotherapy_No	binary(1 vs 0)	80	17	2.21291	0.293427	16.689	0.440982	0.793768	0.533054	0.415626	0.8875
Radiotherapy_Yes	binary(1 vs 0)	80	17	0.451893	0.0599198	3.40801	0.440982	0.793768	0.533054	0.415626	0.1125
Intermediate-stage risk	binary(1 vs 0)	80	17	1.37182	0.507278	3.70977	0.533392	0.79635	0.538912	0.259153	0.3
Sex_Female	binary(1 vs 0)	80	17	1.20284	0.457808	3.16033	0.707866	0.79635	0.519247	0.270067	0.5375
Sex_Male	binary(1 vs 0)	80	17	0.831365	0.316422	2.18432	0.707866	0.79635	0.519247	0.270067	0.4625
Age >45_Yes	binary(1 vs 0)	80	17	1.86399	0.719098	4.83168	0.200052	0.513314	0.576569	0.848035	0.3875
Age >45_No	binary(1 vs 0)	80	17	0.536484	0.206967	1.39063	0.200052	0.513314	0.576569	0.848035	0.6125
Advanced-stage risk	binary(1 vs 0)	80	17	1.22907	0.467741	3.22962	0.675618	0.79635	0.523013	0.513615	0.5375
Supplementary Table S7. Full univariable Cox proportional hazards analysis of clinical variables associated with progression-free survival. CMR, complete molecular response; PMR, partial molecular response

## Sheet: Supplementary Table S8
Timepoint	combo	k	N	Eventos	C-index	p_global_LR	AIC	BIC	loglik	max_abs_r	cond_num
T1	Eotaxin + IL-6	2	79	17	0.713922	0.00870718	138.964	143.703	-67.4822	0.257986	1.30206
T1	Eotaxin + IL-6 + IL-8	3	79	17	0.712224	0.0200338	140.618	147.726	-67.3089	0.446485	1.77643
T1	Eotaxin + IL-6 + MCP-1	3	79	17	0.70798	0.0204643	140.664	147.773	-67.3322	0.719725	2.68449
T1	Eotaxin + MCP-1	2	79	17	0.674024	0.0208711	140.713	145.452	-68.3564	0.719725	2.47706
T1	Eotaxin + IL-6 + MIP-1alpha	3	79	17	0.705433	0.0218638	140.809	147.918	-67.4046	0.53715	1.91825
T1	Eotaxin + IL-6 + IL-2Ralpha	3	79	17	0.71562	0.0224737	140.869	147.978	-67.4347	0.440129	1.70543
T1	Eotaxin + IL-6 + IL-7	3	79	17	0.711375	0.0232029	140.939	148.048	-67.4697	0.475613	1.80654
T1	Eotaxin + IL-6 + Basic FGF	3	79	17	0.71562	0.0234002	140.958	148.066	-67.479	0.58766	2.10973
T1	Eotaxin + IL-6 + IL-4	3	79	17	0.714771	0.0234346	140.961	148.07	-67.4806	0.60019	2.13015
T1	Eotaxin + IL-6 + IL-1 beta	3	79	17	0.713073	0.0234389	140.962	148.07	-67.4808	0.552206	2.15481
T2	IL-7 + Basic FGF	2	38	16	0.784797	0.000855721	98.4134	101.689	-47.2067	0.588488	1.96472
T2	IL-7 + IL-6	2	38	16	0.765525	0.00130832	99.2625	102.538	-47.6312	0.345277	1.43343
T2	IL-7 + IL-2Ralpha	2	38	16	0.793362	0.0015143	99.5549	102.83	-47.7774	0.372203	1.47843
T2	IL-7 + IL-1 beta	2	38	16	0.770878	0.00191753	100.027	103.302	-48.0135	0.746419	2.62432
T2	IL-7 + IL-8	2	38	16	0.786938	0.00207758	100.187	103.463	-48.0937	0.318307	1.39064
T2	IL-7 + MIP-1alpha	2	38	16	0.775161	0.00224423	100.342	103.617	-48.1708	0.52429	1.79004
T2	IL-7 + IL-4	2	38	16	0.776231	0.00226065	100.356	103.631	-48.1781	0.753809	2.66904
T2	Basic FGF + IL-6	2	38	16	0.719486	0.00459346	101.774	105.049	-48.8871	0.152299	1.1659
T2	IL-2Ralpha + Basic FGF	2	38	16	0.751606	0.00595159	102.292	105.567	-49.1461	0.25643	1.2999
T2	Basic FGF + IL-1 beta	2	38	16	0.717345	0.00935765	103.197	106.473	-49.5987	0.635527	2.11834
Supplementary Table S8. Performance of T1 and T2 cytokine combinations in Cox proportional hazards models.

## Sheet: Supplementary Table S9
Comparison	Biomarker	Group	N	Events	C_index_PET2	C_index_PET2_plus_biomarker	Delta_C_index	loglik_PET2	loglik_PET2_plus_biomarker	LR_stat	p_nested_comparison
T2 score IL-7 + Basic FGF	Score_T2_IL7_BasicFGF	On-treatment score	37	15	0.64186	0.782558	0.140698	-47.8035	-41.9702	11.6666	0.000636335
ΔIL-6 T1→T2	Delta_IL6_T1_T2	Early dynamic	37	15	0.64186	0.762791	0.12093	-47.8035	-44.0583	7.49029	0.00620324
ΔIL-6 T1→T3	Delta_IL6_T1_POST	Later dynamic	71	14	0.569555	0.671038	0.101482	-57.5164	-55.0302	4.97237	0.0257554
Baseline score IL-6 + Eotaxin (T1)	Score_T1_IL6_Eotaxin	Baseline	76	15	0.59871	0.676587	0.077877	-61.9694	-58.1669	7.60508	0.0058204
Supplementary Table S9. Incremental prognostic value of selected cytokine-derived biomarkers over interim iPET/CT response.

## Sheet: Supplementary Table S10
Biomarker	N_total	N_nonrelapse	N_relapse	Events	Median_NR	Median_R	AUC_raw	AUC_oriented	N_cox	Events_cox	HR_perSD	HR_lo	HR_hi	p_cox	C_index_cox	p_PH
ΔIL-6 T1→T2	30	20	10	10	-1.175	-8.6825	0.265	0.735	30	10	0.32938	0.145073	0.747841	0.00794277	0.720833	0.180702
T2 IL-7 + Basic FGF score	30	20	10	10	-0.214682	0.279274	0.7325	0.7325	30	10	2.4863	1.15192	5.36641	0.0203268	0.672917	0.327351
ΔIL-6 T1→T3	57	47	10	10	-0.48	-2.615	0.360638	0.639362	57	10	0.50182	0.300188	0.838886	0.00853647	0.652475	0.097274
Baseline IL-6 + Eotaxin score (T1)	61	51	10	10	-0.185588	-0.0842175	0.582353	0.582353	61	10	1.8	1.02755	3.15314	0.0398823	0.588991	0.091638
Supplementary Table S10. Exploratory analysis of cytokine-derived biomarkers for residual relapse risk within the iPET-CT-CMR subgroup. NR, non-relapse; R, relapse.
